# Supplementary material for: Cationic composition engineering in double perovskite XLaLiTeO6:Eu3+(X = Ba, Sr, Ca, and Mg) toward efficient and thermally stable red luminescence for domestic white-LEDs
Source: Royal Society of Chemistry journal article supplement (doi:10.1039/d3tc01509b), 2023-01-01
Supplement: d3tc01509b1.pdf [file d3tc01509b1.pdf]

## Supplementary Information for

# Cationic composition engineering in double perovskite $\text{XLaLiTeO}_6:\text{Eu}^{3+}$ ( $\text{X} = \text{Ba}, \text{Sr}, \text{Ca}, \text{Mg}$ ) toward the efficient and thermally stable red luminescence for domestic white-LEDs

Jing Zhu, Tongsheng Yang, Hong Li, Yuefei Xiang, Ruitong Song, Hongzhi Zhang\*

*Yunnan Key Laboratory of Carbon Neutrality and Green Low-carbon Technologies, Key  
Laboratory of LCR Materials and Devices of Yunnan Province, School of Materials and Energy,  
Yunnan University, Kunming 650091, China*

\*Corresponding author

E-mail: zhanghz@ynu.edu.cn

**This supplement contains:**

Supplemental Figure S1-S9, Table S1-S3

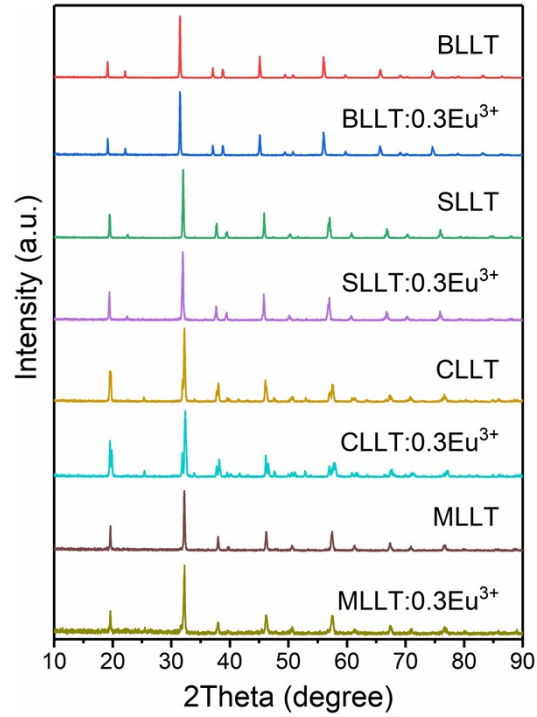

**Figure S1.** XRD patterns of XLLT(:Eu<sup>3+</sup>) samples.

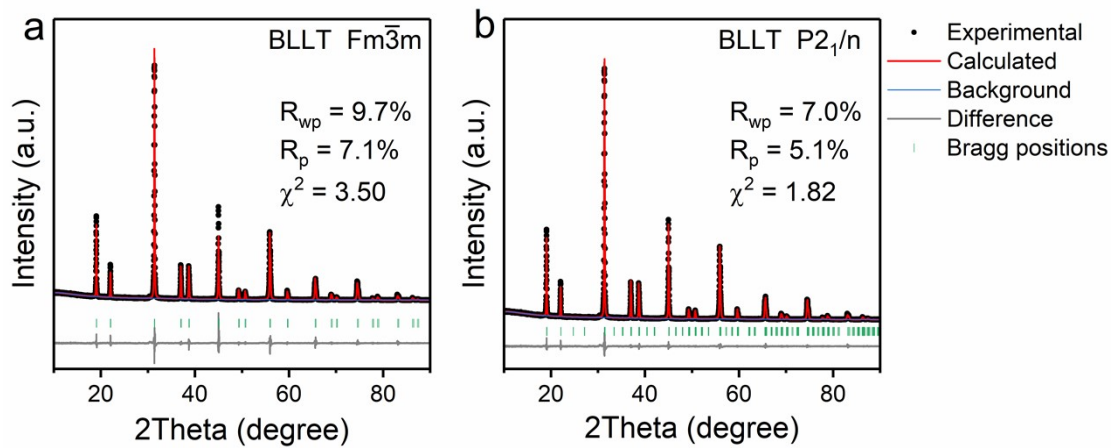

**Figure S2.** Rietveld refinements of the XRD profile of BLLT host using initial

models in space groups (a)  $Fm\bar{3}m$  and (b)  $P2_1/n$ , respectively.

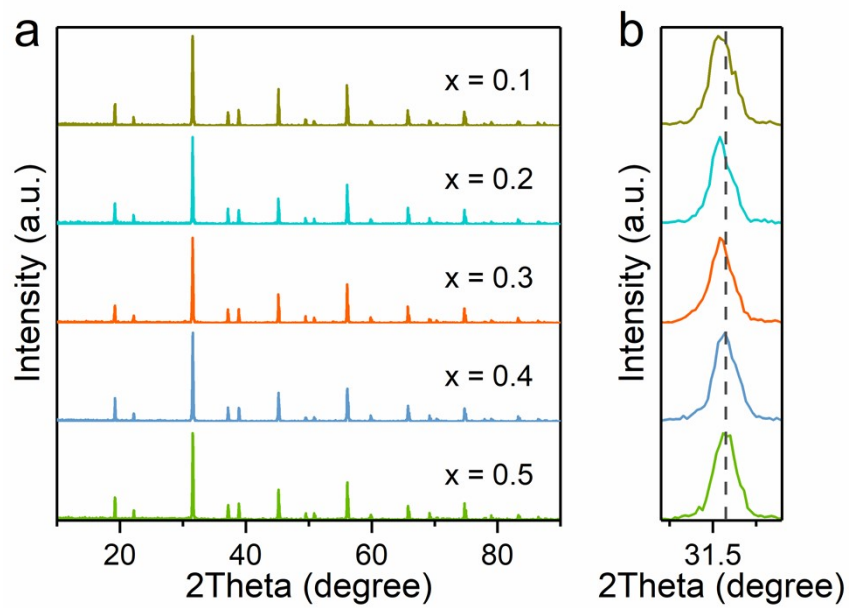

**Figure S3.** (a) XRD patterns of BLLT: $x\text{Eu}^{3+}$  samples and (b) the enlarged versions.

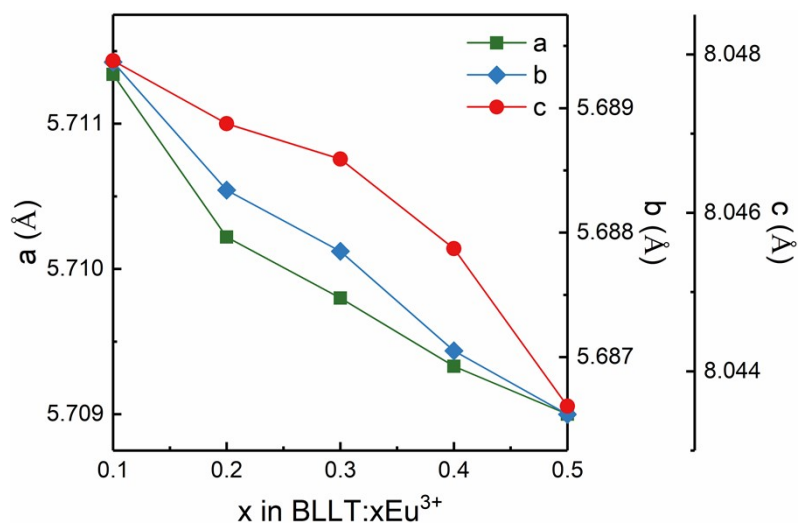

**Figure S4.** Changes of the cell parameters with x in BLLT: $x\text{Eu}^{3+}$ .

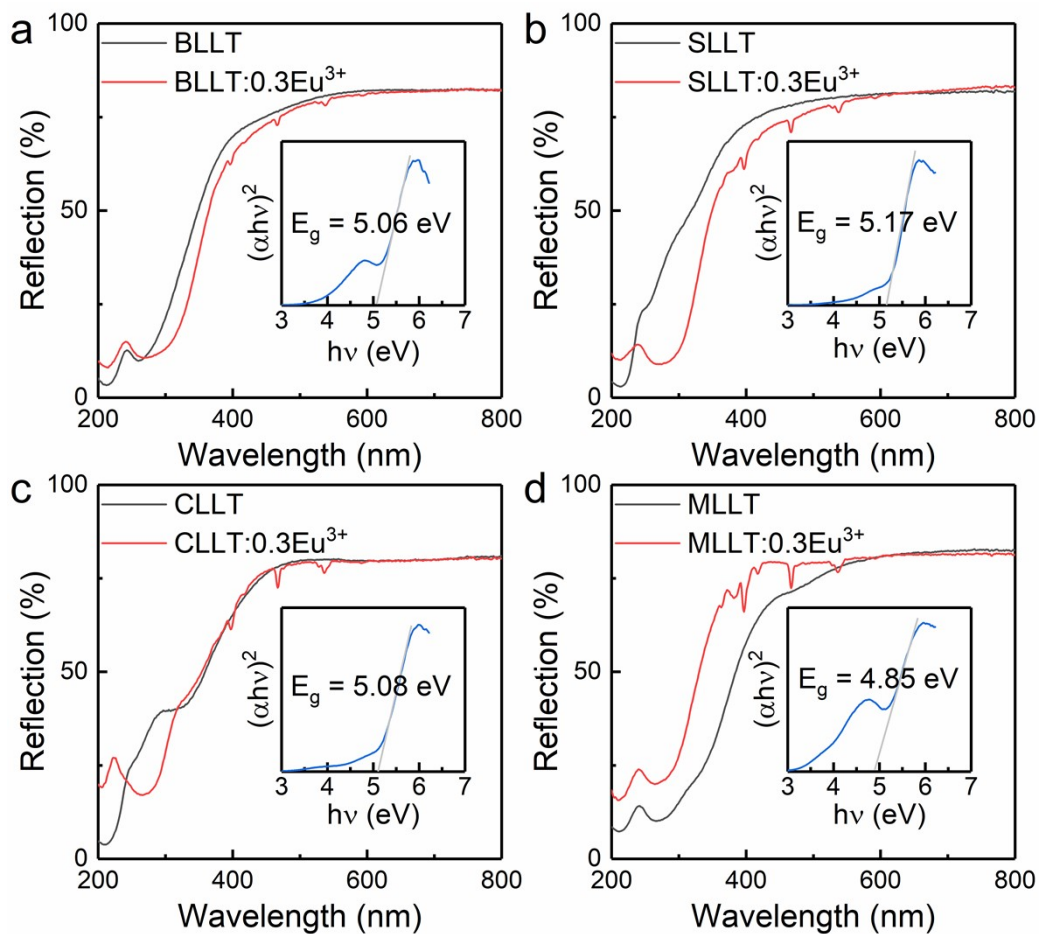

**Figure S5.** UV-vis diffuse reflectance spectra of (a) BLLT(:Eu<sup>3+</sup>), (b) SLLT(:Eu<sup>3+</sup>), (c) CLLT(:Eu<sup>3+</sup>) and (d) MLLT(:Eu<sup>3+</sup>). The insets show the Tauc-plots of the hosts.

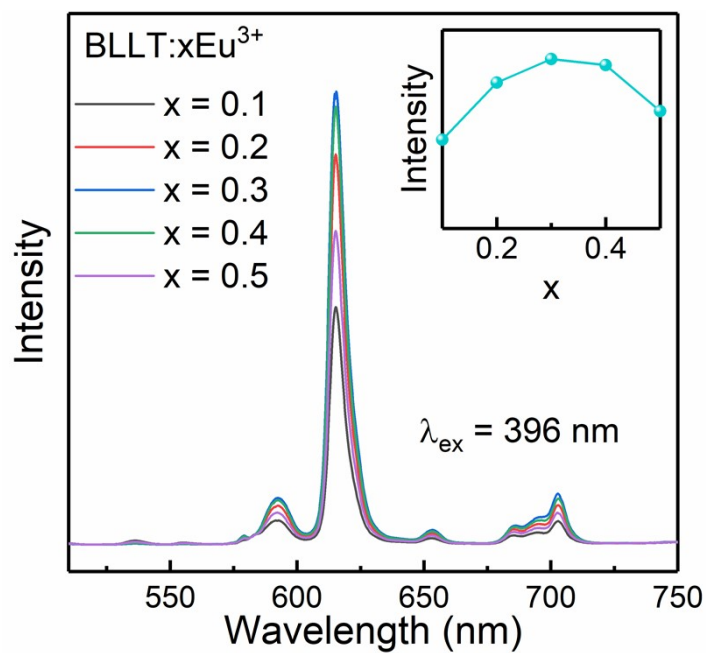

**Figure S6.** The emission spectra of BLLT: $x\text{Eu}^{3+}$ , and the inset depicts emission intensity as a function of  $x$ .

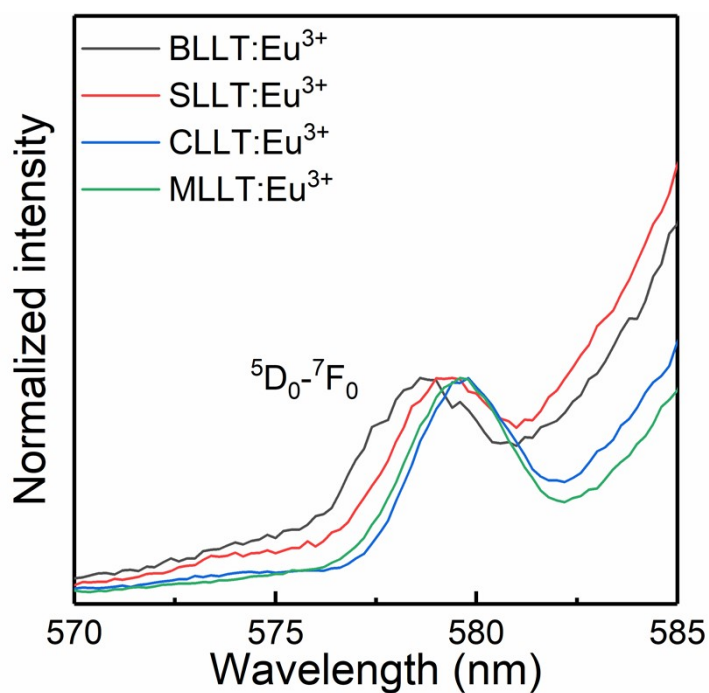

**Figure S7.**  ${}^5\text{D}_0-{}^7\text{F}_0$  transition spectra of XLLT: $\text{Eu}^{3+}$  ( $X = \text{Ba}, \text{Sr}, \text{Ca}$  and  $\text{Mg}$ ).

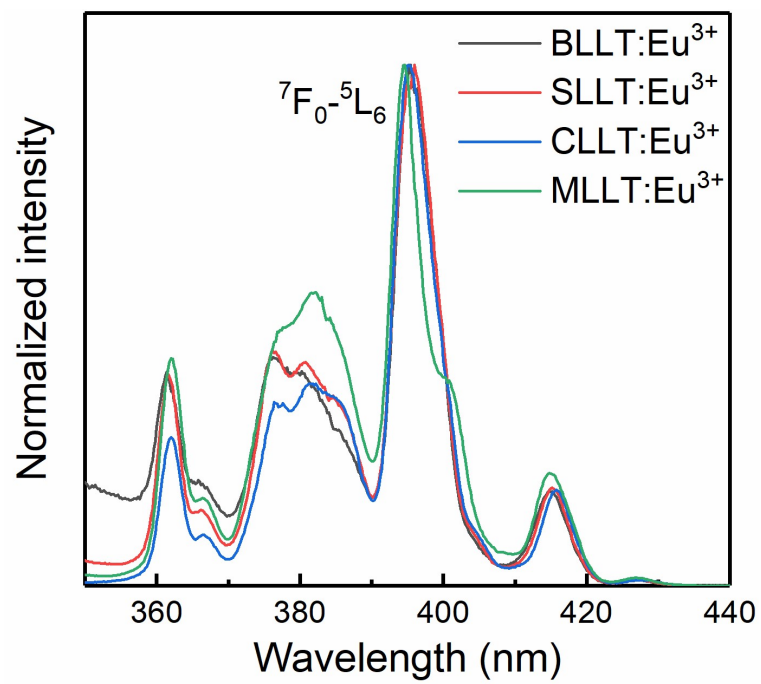

**Figure S8.** Normalized  ${}^7F_0-{}^5L_6$  transition spectra of XLLT:Eu<sup>3+</sup> (X = Ba, Sr, Ca and Mg).

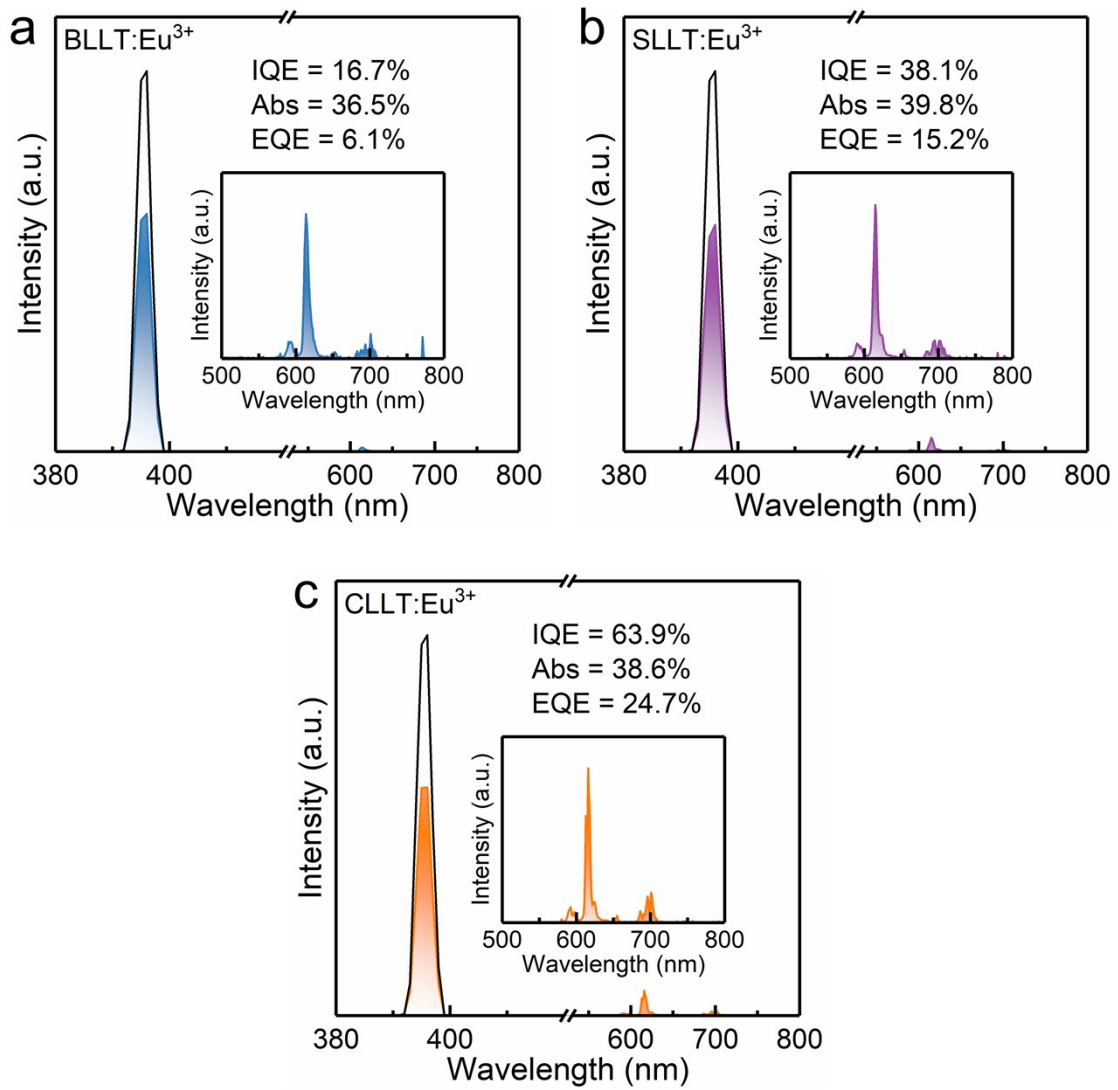

**Figure S9.** Quantum efficiency and absorption factor determination details of (a)

BLLT:Eu<sup>3+</sup>, (b) SLLT:Eu<sup>3+</sup> and (c) CLLT:Eu<sup>3+</sup>.

**Table S1.** Fractional atomic coordinates, occupancy factors, isotropic displacement parameters ( $\text{\AA}^2$ ) and main parameters of processing of the refinements of  $\text{XLLT:Eu}^{3+}$ .

**(a) *BLLT:Eu*<sup>3+</sup>**

| Atom | Wyckoff position | <i>x</i>  | <i>y</i>   | <i>z</i>  | Occ. | $U_{\text{iso}} \times 100$ |
|------|------------------|-----------|------------|-----------|------|-----------------------------|
| Ba   | 4e               | 0.4995(5) | 0.5026(4)  | 0.2542(9) | 0.5  | 2.69(6)                     |
| La   | 4e               | 0.4995(5) | 0.5026(4)  | 0.2542(9) | 0.35 | 2.69(6)                     |
| Eu   | 4e               | 0.4995(5) | 0.5026(4)  | 0.2542(9) | 0.15 | 2.69(6)                     |
| Li   | 2d               | 1/2       | 0          | 0         | 1    | 2                           |
| Te   | 2a               | 0         | 1/2        | 0         | 1    | 2.59(7)                     |
| O1   | 4e               | 0.2003(6) | 0.1854(4)  | 0.0017(4) | 1    | 5.78(3)                     |
| O2   | 4e               | 0.2161(7) | 0.7792(1)  | 0.0074(7) | 1    | 5.24(8)                     |
| O3   | 4e               | 0.5334(7) | -0.0022(4) | 0.2408(1) | 1    | 5.25(0)                     |

Space group:  $P2_1/n$  (No.14), Monoclinic.  $a = 5.7098(0) \text{ \AA}$ ,  $b = 5.6878(5) \text{ \AA}$ ,  $c = 8.0466(8) \text{ \AA}$ ,  $\beta = 89.8810^\circ$ ,  $R_{\text{wp}} = 7.5\%$ ,  $R_p = 5.4\%$ ,  $\chi^2 = 1.84$ .

**(b) *SLLT:Eu*<sup>3+</sup>**

| Atom | Wyckoff position | <i>x</i>  | <i>y</i>  | <i>z</i>   | Occ. | $U_{\text{iso}} \times 100$ |
|------|------------------|-----------|-----------|------------|------|-----------------------------|
| Sr   | 4e               | 0.4984(0) | 0.5156(3) | 0.2504(5)  | 0.5  | 3.35(6)                     |
| La   | 4e               | 0.4984(0) | 0.5156(3) | 0.2504(5)  | 0.35 | 3.35(6)                     |
| Eu   | 4e               | 0.4984(0) | 0.5156(3) | 0.2504(5)  | 0.15 | 3.35(6)                     |
| Li   | 2d               | 1/2       | 0         | 0          | 1    | 2                           |
| Te   | 2a               | 0         | 1/2       | 0          | 1    | 3.67(2)                     |
| O1   | 4e               | 0.2080(6) | 0.2440(6) | -0.0324(7) | 1    | 5.20(3)                     |
| O2   | 4e               | 0.2790(5) | 0.7132(5) | 0.0199(6)  | 1    | 3.71(7)                     |
| O3   | 4e               | 0.5350(7) | 0.0202(5) | 0.2280(7)  | 1    | 5.32(5)                     |

Space group:  $P2_1/n$  (No.14), Monoclinic.  $a = 5.6300(0) \text{ \AA}$ ,  $b = 5.5926(2) \text{ \AA}$ ,  $c = 7.9329(1) \text{ \AA}$ ,  $\beta = 90.0841^\circ$ ,  $R_{\text{wp}} = 8.7\%$ ,  $R_p = 6.2\%$ ,  $\chi^2 = 3.85$ .

**(c) *CLLT:Eu*<sup>3+</sup>**

| Atom | Wyckoff position | <i>x</i>  | <i>y</i>  | <i>z</i>  | Occ. | $U_{\text{iso}} \times 100$ |
|------|------------------|-----------|-----------|-----------|------|-----------------------------|
| Ca   | 4e               | 0.5018(7) | 0.5240(3) | 0.2417(9) | 0.5  | 2.74(7)                     |
| La   | 4e               | 0.5018(7) | 0.5240(3) | 0.2417(9) | 0.35 | 2.74(7)                     |
| Eu   | 4e               | 0.5018(7) | 0.5240(3) | 0.2417(9) | 0.15 | 2.74(7)                     |
| Li   | 2d               | 1/2       | 0         | 0         | 1    | 2                           |
| Te   | 2a               | 0         | 1/2       | 0         | 1    | 3.38(4)                     |



|    |    |           |            |           |   |         |
|----|----|-----------|------------|-----------|---|---------|
| O1 | 4e | 0.1296(0) | 0.3082(7)  | 0.0961(9) | 1 | 5.75(5) |
| O2 | 4e | 0.2261(2) | 0.7933(6)  | 0.0117(4) | 1 | 3.31(9) |
| O3 | 4e | 0.6005(6) | -0.0833(0) | 0.1435(1) | 1 | 4.84(2) |

Space group:  $P2_1/n$  (No.14), Monoclinic.  $a = 5.6377(5)$  Å,  $b = 5.5437(8)$  Å,  $c = 7.8617(8)$  Å,  $\beta = 90.0018^\circ$ ,  $R_{wp} = 7.4\%$ ,  $R_p = 5.5\%$ ,  $\chi^2 = 1.94$ .

**(d) MLLT:Eu<sup>3+</sup>**

| Atom | Wyckoff position | $x$       | $y$       | $z$        | Occ. | $U_{iso} \times 100$ |
|------|------------------|-----------|-----------|------------|------|----------------------|
| Mg   | 4e               | 0.4944(6) | 0.5159(1) | 0.2523(1)  | 0.5  | 2.63(9)              |
| La   | 4e               | 0.4944(6) | 0.5159(1) | 0.2523(1)  | 0.35 | 2.63(9)              |
| Eu   | 4e               | 0.4944(6) | 0.5159(1) | 0.2523(1)  | 0.15 | 2.63(9)              |
| Li   | 2d               | 1/2       | 0         | 0          | 1    | 2                    |
| Te   | 2a               | 0         | 1/2       | 0          | 1    | 2.78(9)              |
| O1   | 4e               | 0.2401(4) | 0.0980(1) | -0.0035(1) | 1    | 5.85(8)              |
| O2   | 4e               | 0.1994(7) | 0.7864(1) | 0.0149(8)  | 1    | 3.02(3)              |
| O3   | 4e               | 0.5341(3) | 0.0267(9) | 0.2568(8)  | 1    | 3.84(2)              |

Space group:  $P2_1/n$  (No.14), Monoclinic.  $a = 5.5483(2)$  Å,  $b = 5.5466(4)$  Å,  $c = 7.8623(5)$  Å,  $\beta = 89.8228^\circ$ ,  $R_{wp} = 8.1\%$ ,  $R_p = 5.7\%$ ,  $\chi^2 = 2.32$ .

**Table S2.** The ionic radii of the cations in the different folds of coordination.

| Ion              | Coordination | Ionic radii (Å) |
|------------------|--------------|-----------------|
| Mg <sup>2+</sup> | 6            | 0.72            |
| La <sup>3+</sup> | 7            | 1.10            |
| Eu <sup>3+</sup> | 7            | 1.01            |
| Li <sup>+</sup>  | 6            | 0.76            |
| Te <sup>6+</sup> | 6            | 0.56            |

**Table S3.** Electroluminescence properties of blue-emitting Na<sub>1.3</sub>Hf<sub>1.7</sub>Sc<sub>0.3</sub>(PO<sub>4</sub>)<sub>3</sub>:Eu<sup>2+</sup>, yellow-emitting Ba, Sr)<sub>2</sub>SiO<sub>4</sub>:Eu<sup>2+</sup> and red-emitting MLLT:Eu<sup>3+</sup> phosphors and 395 nm n-UV LED chip based white-LED device under various currents.

| Current (mA) | Coordinate<br>( $x, y$ ) | CCT<br>(K) | CRI<br>(R <sub>a</sub> ) | Luminous efficacy<br>(lm · W <sup>-1</sup> ) |
|--------------|--------------------------|------------|--------------------------|----------------------------------------------|
|--------------|--------------------------|------------|--------------------------|----------------------------------------------|

|     |                  |      |      |       |
|-----|------------------|------|------|-------|
| 50  | (0.4236, 0.4197) | 3357 | 88.1 | 15.31 |
| 100 | (0.4217, 0.4197) | 3402 | 88.2 | 15.61 |
| 150 | (0.4198, 0.4199) | 3432 | 88.4 | 15.11 |
| 200 | (0.4170, 0.4204) | 3490 | 89.1 | 14.51 |
| 250 | (0.4156, 0.4206) | 3516 | 89.2 | 14.21 |
| 300 | (0.4146, 0.4206) | 3537 | 89.3 | 13.91 |
| 350 | (0.4086, 0.4186) | 3643 | 89.8 | 12.61 |

---
